# Supplementary material for: The 852/3 CE Mount Churchill eruption: examining the potential climatic and societal impacts and the timing of the Medieval Climate Anomaly in the North Atlantic Region
Source: Copernicus journal article supplement (doi:10.5194/cp-2021-170), 2021-12-02
Supplement: Supplementary file [file cp-2021-170-AC3-supplement.pdf]

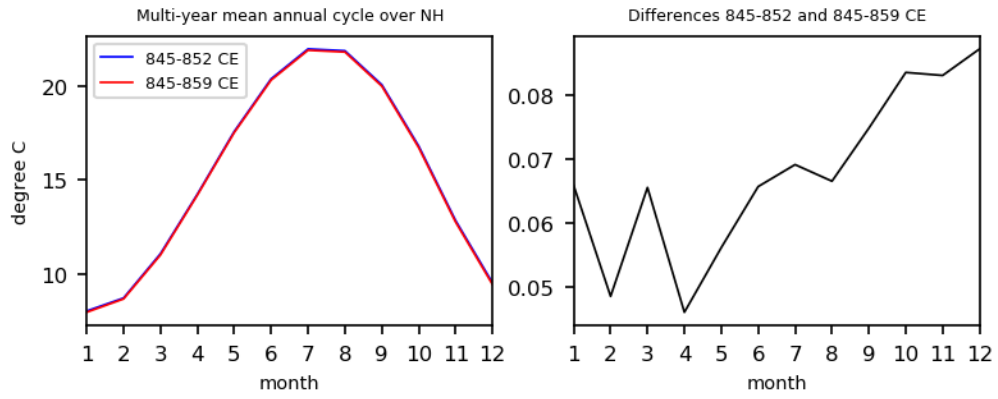

Fig R1. (left) Globally averaged multi-year monthly mean temperatures of two reference periods: 845-852 CE (blue) and 845-859 CE (red), (right) differences between the monthly means of 845-852 CE and 845-859 CE.
